# Supplementary material
Source: PubMed Central journal article supplement (PMC5742050)
Supplement: NIHMS898062-supplement-Supp_TableS2.pdf [file NIHMS898062-supplement-Supp_TableS2.pdf]

**Supplemental Table 2 – Solid tumor burden as measured from CT or PET imaging within one month of blood draw, and serum LDH values (n=25 patients)**

| Patient number     | Disease status at time of blood draw <sup>1</sup> | Treatment at time of blood draw <sup>2</sup>  | Total tumor burden (cm) <sup>3</sup> | Number of lesions measured <sup>3</sup> | Range in size of measured lesions (cm) <sup>3</sup> | Metastatic sites at time of blood draw <sup>4</sup>            | Serum LDH (U/L) <sup>5</sup> |
|--------------------|---------------------------------------------------|-----------------------------------------------|--------------------------------------|-----------------------------------------|-----------------------------------------------------|----------------------------------------------------------------|------------------------------|
| 294                | AD                                                | Dabrafenib, trametinib                        | X                                    | X                                       | X                                                   | X                                                              | 225                          |
| 652                | AD                                                | Dabrafenib, trametinib                        | 16.3                                 | 4                                       | 1.6 – 7.0                                           | LN                                                             | 326                          |
| 1154               | AD                                                | None                                          | 19.9                                 | 8                                       | 1.0 – 4.3                                           | Skin/subcutaneous, liver, heart, adrenal, kidney, adnexal mass | 179                          |
| 1939               | AD                                                | None                                          | 10.8                                 | 5                                       | 1.1 – 3.7                                           | Liver, lung                                                    | 609                          |
| 1429               | AD                                                | Ipilimumab, nivolumab                         | 48.5                                 | 12                                      | 1.7 – 7.8                                           | LN, liver, adrenal, bone                                       | 1835                         |
| 65                 | AD                                                | Pembrolizumab                                 | X                                    | X                                       | X                                                   | X                                                              | 182                          |
| 423                | AD                                                | Pembrolizumab                                 | X                                    | X                                       | X                                                   | X                                                              | 247                          |
| 1092               | AD                                                | Ipilimumab                                    | 8.1                                  | 5                                       | 1.0 – 2.6                                           | Skin/subcutaneous                                              | 212                          |
| 570                | AD                                                | Dabrafenib, trametinib, ipilimumab, nivolumab | X                                    | X                                       | X                                                   | X                                                              | 213                          |
| 1439               | AD                                                | Ipilimumab, radiation                         | 16.9                                 | 6                                       | 1.1 – 7.8                                           | Lung, colorectal, retroperitoneal                              | 206                          |
| 1258               | AD                                                | None                                          | 44.3                                 | 12                                      | 1.1 – 18.1                                          | Skin/subcutaneous, LN, liver, lung,                            | 3923                         |
| 1368               | AD                                                | Ipilimumab                                    | X                                    | X                                       | X                                                   | X                                                              | 206                          |
| 765                | AD                                                | Ipilimumab                                    | X                                    | X                                       | X                                                   | X                                                              | 200                          |
| 1334               | AD                                                | None                                          | 4.9                                  | 2                                       | 2.2 – 2.7                                           | Lung                                                           | 222                          |
| <b><u>939</u></b>  | NED                                               | None                                          | 0.0                                  | -                                       | -                                                   | -                                                              | 170                          |
| 1202               | AD                                                | Ipilimumab                                    | X                                    | X                                       | X                                                   | X                                                              | 183                          |
| 1296               | AD                                                | Pembrolizumab                                 | 0.6                                  | 1                                       | 0.6                                                 | LN                                                             | 160                          |
| 1778               | AD                                                | Dabrafenib, trametinib                        | X                                    | X                                       | X                                                   | X                                                              | 262                          |
| <b><u>940</u></b>  | NED                                               | Pembrolizumab, trametinib                     | 0.0                                  | -                                       | -                                                   | -                                                              | 199                          |
| <b><u>1747</u></b> | NED                                               | None                                          | 0.0                                  | -                                       | -                                                   | -                                                              | 157                          |
| 671                | AD                                                | Pembrolizumab                                 | X                                    | X                                       | X                                                   | X                                                              | 167                          |
| 396                | AD                                                | None                                          | 2.1                                  | 1                                       | 2.1                                                 | LN                                                             | 182                          |
| 495                | AD                                                | Dabrafenib, trametinib                        | 2.9                                  | 1                                       | 2.9                                                 | LN                                                             | 211                          |
| 1153               | AD                                                | None                                          | X                                    | X                                       | X                                                   | X                                                              | 174                          |
| 1251               | AD                                                | Ipilimumab                                    | 2.1                                  | 1                                       | 2.1                                                 | Liver                                                          | 214                          |

<sup>1</sup>AD=Active disease (measurable tumor by imaging), NED=No evidence of disease. Patient numbers are bolded and underlined for 3 NED patients.

<sup>2</sup>Any treatment received within one month of blood draw

<sup>3</sup>Tumor burden is measured as the sum of the long dimension of all measurable lesions as detected by CT or PET scan within one month of blood draw. X indicates no scan within one month.

<sup>4</sup>As detected by CT or PET scan within one month of blood draw. LN = lymph node

<sup>5</sup>U/L = units per liter
