# Supplementary material
Source: PubMed Central journal article supplement (PMC5742050)
Supplement: NIHMS898062-supplement-Supp_TableS3.pdf [file NIHMS898062-supplement-Supp_TableS3.pdf]

**Supplemental Table 3 – Plasma volumes and cfDNA yields  
(n = 25 patients)**

| <b>Patient number</b> | <b>Plasma volume used as input for cfDNA extraction (mL)</b> | <b>Plasma cfDNA yield (ng)</b> | <b>cfDNA concentration (ng/mL)</b> |
|-----------------------|--------------------------------------------------------------|--------------------------------|------------------------------------|
| 294                   | 4                                                            | 28.60                          | 7.15                               |
| 652                   | 4                                                            | 4.50                           | 1.13                               |
| 1154                  | 4                                                            | 43.20                          | 10.80                              |
| 1939                  | 4                                                            | 69.75                          | 17.44                              |
| 1429                  | 4                                                            | 420.00                         | 105.00                             |
| 65                    | 4                                                            | 2.40                           | 0.60                               |
| 423                   | 4                                                            | 8.25                           | 2.06                               |
| 1092                  | 4                                                            | 16.80                          | 4.20                               |
| 570                   | 4                                                            | 28.95                          | 7.24                               |
| 1439                  | 2.7                                                          | 43.08                          | 15.96                              |
| 1258                  | 4                                                            | 1560.00                        | 390.00                             |
| 1368                  | 2.7                                                          | 25.27                          | 9.36                               |
| 765                   | 4                                                            | 15.20                          | 3.80                               |
| 1334                  | 1                                                            | 59.60                          | 59.60                              |
| 939                   | 3                                                            | 32.50                          | 10.83                              |
| 1202                  | 2.7                                                          | 28.40                          | 10.52                              |
| 1296                  | 4                                                            | 4.20                           | 1.05                               |
| 1778                  | 4                                                            | 34.65                          | 8.66                               |
| 940                   | 4                                                            | 8.25                           | 2.06                               |
| 1747                  | 4                                                            | 31.80                          | 7.95                               |
| 671                   | 4                                                            | 4.50                           | 1.13                               |
| 396                   | 4                                                            | 22.00                          | 5.50                               |
| 495                   | 2                                                            | 20.00                          | 10.00                              |
| 1153                  | 5                                                            | 39.00                          | 7.80                               |
| 1251                  | 3                                                            | 20.00                          | 6.67                               |
