# Supplementary material
Source: PubMed Central journal article supplement (PMC5742050)
Supplement: NIHMS898062-supplement-Supp_TableS4.pdf [file NIHMS898062-supplement-Supp_TableS4.pdf]

Supplemental Table 4 – Summary of NGS timing, treatment received, and mutations detected (n = 25 patients)

| Patient number | Days between tissue and plasma acquisition <sup>1</sup> | Treatment received at any time between tissue and plasma acquisition <sup>2</sup> | Mutations detected in plasma <sup>3,4</sup> | Mutations detected in tissue <sup>1,3</sup>        |
|----------------|---------------------------------------------------------|-----------------------------------------------------------------------------------|---------------------------------------------|----------------------------------------------------|
| 294            | -                                                       | Vemurafenib, ipilimumab, pembrolizumab, dabrafenib, trametinib                    | AKT3 Q78K<br>BRAF V600E                     | -                                                  |
| 652            | 820                                                     | Dabrafenib, trametinib                                                            | BRAF V600E                                  | BRAF V600E                                         |
| 1154           | 55                                                      | None                                                                              | BRAF V600E                                  | BRAF V600E                                         |
| 1939           | 166                                                     | Radiation                                                                         | NRAS Q61K                                   | NRAS Q61K                                          |
| 1429           | 204                                                     | Pembrolizumab, IDO inhibitor, ipililumab, nivolumab, radiation, chemotherapy      | NRAS Q61K                                   | NRAS Q61K                                          |
| 65             | 1605                                                    | Ipililumab, pembrolizumab                                                         | NRAS Q61R<br><b>ND, ND</b>                  | NRAS Q61R<br>CTNNB1 S37F, TP53 Q144X               |
| 423            | 251                                                     | Pembrolizumab                                                                     | NRAS Q61K<br><b>ND</b>                      | <b>ND</b><br>NRAS Q61L                             |
| 1092           | -                                                       | Ipililumab                                                                        | KIT V399I                                   | -                                                  |
| 570            | 199                                                     | Pembrolizumab, ipililumab, nivolumab, dabrafenib, trametinib                      | KIT G565V<br><b>ND</b>                      | KIT G565V<br>BRAF V600E                            |
| 1439           | 54                                                      | Ipililumab, radiation                                                             | KIT V560D                                   | KIT V560D                                          |
| 1258           | 976                                                     | Radvax, pembrolizumab, cyberKnife                                                 | TP53 S241T<br>PTEN Q298E                    | TP53 S241T<br>PTEN Q298E                           |
| 1368           | 84                                                      | Ipililumab, stereotactic body ration therapy (SBRT)                               | PIK3CA R93W                                 | <b>ND</b>                                          |
| 765            | 405                                                     | Ipilimumab                                                                        | <b>ND</b>                                   | NRAS Q61K                                          |
| 1334           | 49                                                      | None                                                                              | <b>ND</b>                                   | TP53 S241F                                         |
| 939            | 1041                                                    | Pegylated interferon, lymph node radiation                                        | <b>ND</b>                                   | BRAF V600E                                         |
| 1202           | 756                                                     | Ipililumab                                                                        | <b>ND, ND</b><br><b>ND, ND</b>              | BRAF G466E, TP53 S241F<br>PDGFRA P581L, PTEN D252N |
| 1296           | 243                                                     | Pembrolizumab                                                                     | <b>ND, ND</b>                               | BRAF V600E, TP53 R306*                             |
| 1778           | 93                                                      | Dabrafenib, trametinib                                                            | <b>ND</b>                                   | BRAF V600E                                         |
| 940            | 588                                                     | Ipililumab, pembrolizumab, trametinib                                             | <b>ND</b>                                   | NRAS Q61K                                          |
| 1747           | 187                                                     | None                                                                              | <b>ND</b>                                   | BRAF V600E                                         |
| 671            | 161                                                     | Pembrolizumab                                                                     | <b>ND</b>                                   | BRAF V600R                                         |
| 396            | -                                                       | None                                                                              | <b>ND</b>                                   | -                                                  |
| 495            | 587                                                     | Ipilimumab, nivolumab, vemurafenib+HCQ, dabrafenib, trametinib, Gamma knife       | <b>ND, ND</b>                               | BRAF V600E, KIT I563K                              |
| 1153           | 214                                                     | None                                                                              | <b>ND</b>                                   | NRAS Q61R                                          |
| 1251           | 70                                                      | Ipililumab                                                                        | <b>ND</b>                                   | TP53 E294*                                         |

<sup>1</sup>A dash indicates that no tissue sequencing was performed prior to blood draw. <sup>2</sup>For the 3 patients with no tissue NGS (1092, 294, 396), the treatment listed is that received prior to plasma acquisition. <sup>3</sup>ND indicates mutation not detected. <sup>4</sup>A total of 16 mutations were detected in plasma, however, 2 were not covered by the tissue NGS panel. Listed here are the 14 mutations detected in plasma and also covered by the tissue NGS panel.
