# Supplementary material
Source: PubMed Central journal article supplement (PMC5742050)
Supplement: NIHMS898062-supplement-Supp_TableS5.pdf [file NIHMS898062-supplement-Supp_TableS5.pdf]

**Supplemental Table 5** - Comparison of tissue 47-gene and plasma 61-gene panels<sup>1</sup>

---

| <b>Covered by Both Panels</b>       |               |              |                         |                |               |               |               |
|-------------------------------------|---------------|--------------|-------------------------|----------------|---------------|---------------|---------------|
| <i>AKT1</i>                         | <i>ALK</i>    | <i>ATM</i>   | <i>BRAF</i>             | <i>CDH1</i>    | <i>CTNNB1</i> | <i>EGFR</i>   | <i>ERBB2</i>  |
| <i>FBXW7</i>                        | <i>FGFR1</i>  | <i>FGFR2</i> | <i>FGFR3</i>            | <i>FLT3</i>    | <i>GNA11</i>  | <i>GNAS</i>   | <i>GNAQ</i>   |
| <i>HRAS</i>                         | <i>IDH1</i>   | <i>KDR</i>   | <i>KIT</i>              | <i>KRAS</i>    | <i>MET</i>    | <i>NOTCH1</i> | <i>NRAS</i>   |
| <i>PDGFRA</i>                       | <i>PIK3CA</i> | <i>PTEN</i>  | <i>RET</i>              | <i>SMO</i>     | <i>TP53</i>   | <i>VHL</i>    |               |
| <b>Covered Only by ctDNA Panel</b>  |               |              |                         |                |               |               |               |
| <i>AKT3</i>                         | <i>ALG10</i>  | <i>AR</i>    | <i>CDKN2A</i>           | <i>CDKN2B</i>  | <i>CWH43</i>  | <i>DDR2</i>   | <i>EMBP1</i>  |
| <i>EPHA3</i>                        | <i>ESR1</i>   | <i>FGFR4</i> | <i>FOXL2</i>            | <i>HGF</i>     | <i>HOXD8</i>  | <i>IDH2</i>   | <i>IGF1R</i>  |
| <i>MAP2K1</i>                       | <i>MAP2K2</i> | <i>MITF</i>  | <i>NF1</i> <sup>2</sup> | <i>NTRK1</i>   | <i>NTRK2</i>  | <i>NTRK3</i>  | <i>PHLPP1</i> |
| <i>PIK3R1</i>                       | <i>RAC1</i>   | <i>ROS1</i>  | <i>TSC1</i>             | <i>TSC2</i>    | <i>ZNF716</i> |               |               |
| <b>Covered Only by Tissue Panel</b> |               |              |                         |                |               |               |               |
| <i>ABL1</i>                         | <i>CSF1R</i>  | <i>ERBB4</i> | <i>HNF1A</i>            | <i>JAK2</i>    | <i>JAK3</i>   | <i>MLH1</i>   | <i>MPL</i>    |
| <i>NPM1</i>                         | <i>PTPN11</i> | <i>RB1</i>   | <i>SMAD4</i>            | <i>SMARCB1</i> | <i>SRC</i>    | <i>APC</i>    | <i>STK11</i>  |

---

<sup>1</sup>Full exon coverage for all 61 genes except *NF1*, plus intron tiling for *ALK*, *RET*, and *ROS1*.

<sup>2</sup>Full exon coverage for all *NF1* exons except the last, 3-prime, exon.
